# Supplementary material for: The Effectiveness of Community-Based Continuous Training on Promoting Positive Behaviors towards Birth Preparedness, Male Involvement, and Maternal Services Utilization among Expecting Couples in Rukwa, Tanzania: A Theory of Planned Behavior Quasi-Experimental Study
Source: J Environ Public Health. 2018 Sep 27;2018:1293760. doi: 10.1155/2018/1293760 (PMC6180969; doi:10.1155/2018/1293760)
Supplement: Supplementary Materials — contain first questionnaire (female partners) and second questionnaire (male partners). [file 1293760.f1.pdf]

## APPENDIX: QUESTIONNAIRES

### First questionnaire: Female Partners

#### Part A: Baseline Information

Please tick (✓) the appropriate option

1. Age in years in years \_\_\_\_\_
2. Age at marriage in years \_\_\_\_\_
3. Marital status
  - a) Married ( )
  - b) Cohabited ( )
4. Educational status
  - a) None ( )
  - b) Primary level incomplete ( )
  - c) Primary level complete ( )
  - d) Secondary or higher ( )
5. Employment status
  - a) Employed ( )
  - b) Unemployed ( )
6. Religion
  - a) Christian ( )
  - b) Muslims ( )
  - c) Others  
specify.....
7. Ethnic group
  - a) Fipa ( )
  - b) Mambwe ( )
  - c) Others  
specify.....
8. Economic status
  - a) Use less than one dollar per day ( )
  - b) Use more than one dollar per day ( )
9. Do you own radio?
  - a) Yes ( )
  - b) No ( )
10. Do you own mobile phone?
  - a) Yes ( )
  - b) No ( )
11. Characteristic of a nearby health facility
  - a) Dispensary ( )
  - b) Health center ( )
  - c) Hospital ( )
12. What is the walking distance to a nearby health facility?
  - a) Less than one kilometer ( )
  - b) One kilometer-5kilometers ( )
  - c) More than five kilometers ( )

13. Are you covered with health Insurance (NHIF or CHF)?  
 a) Yes ( )  
 b) No ( )
14. Pregnancy history  
 a) Primigravida ( )  
 b) Para 1-Para 4 ( )  
 c) Para 5+ ( )
15. Age at 1<sup>st</sup> delivery (years)\_\_\_\_\_
16. Current pregnancy characteristics  
 a) Planned ( )  
 b) Unplanned ( )
17. Did you have prior pre-term delivery?  
 a) Yes ( )  
 b) No ( )  
 c) Not applicable ( )
18. Did you have a prior C-section?  
 a) Yes ( ) b) No ( ) c) Not applicable ( )
19. Have you ever heard the term “birth preparedness”?  
 a) Yes ( ) b) No ( )
20. Where did you hear about birth preparedness?  
 a) From health worker ( )  
 b) From the media ( )  
 c) From a family member ( )  
 d) Others specify\_\_\_\_\_

## **Part B: Knowledge on Birth Preparedness**

Now I would like to ask you some questions about pregnancy and childbirth. Specifically, I am going to be asking you questions about three different phases that women go through when having a child. These phases are the period of being pregnant, the period of labor and birth, and the period immediately after the birth of the child (JHPIEGO, 2004).

21. Can unforeseen problems related to pregnancy occur during any pregnancy or childbirth that could endanger the life of a woman?  
 a) Yes ( ) b) No ( )

22. What are some serious health problems that can occur during pregnancy that could endanger the life of a pregnant woman?

a) \_\_\_\_\_ d) \_\_\_\_\_

b) \_\_\_\_\_ e) \_\_\_\_\_

c) \_\_\_\_\_ f) \_\_\_\_\_

23. Could a woman die from [this problem] any of these problems?

a) Yes ( ) b) No ( )

24. What are some serious health problems that can occur during labor and childbirth that could endanger the life of a pregnant woman?

a) \_\_\_\_\_ d) \_\_\_\_\_

b) \_\_\_\_\_ e) \_\_\_\_\_

c) \_\_\_\_\_ f) \_\_\_\_\_

25. Could a woman die from [this problem] any of these problems?

a) Yes ( ) b) No ( )

26. What are some serious health problems that can occur during the first 42 days after birth that could endanger the life of the woman?

a) \_\_\_\_\_ d) \_\_\_\_\_

b) \_\_\_\_\_ e) \_\_\_\_\_

c) \_\_\_\_\_ f) \_\_\_\_\_

27. Could a woman die from [this problem] any of these problems?

a) Yes ( ) b) No ( )

28. Now, I would like to ask you a few questions about the health of newborn babies. What are some serious health problems that can occur during the first 7 days after birth that could endanger the life of a newborn baby?

- a) \_\_\_\_\_ d) \_\_\_\_\_
- b) \_\_\_\_\_ e) \_\_\_\_\_
- c) \_\_\_\_\_ f) \_\_\_\_\_

29. Could a newborn baby die from [this problem] any of these problems?

- a) Yes ( ) b) No ( )

30. What are the six key elements of birth preparedness?

- a) \_\_\_\_\_ d) \_\_\_\_\_
- b) \_\_\_\_\_ e) \_\_\_\_\_
- c) \_\_\_\_\_ f) \_\_\_\_\_

31. When a pregnant woman has to start antenatal clinic?

- a) Below 16 weeks gestation age ( )
- b) 17-24 weeks ( )
- c) Above 24 weeks ( )

32. What are the recommended antenatal visits

- a) Four or more ( )
- b) Three ( )
- c) Two ( )
- d) One ( )

**Part C: Female partners behavior intentions on birth preparedness, male involvement and maternal services utilization**

Many questions in this survey make use of rating scales with 4 places; you are to tick (✓) the box that best describes your opinion where SA= strongly agree, A= agree, N= Neutral, D= disagree and SD = strongly disagree

| Component                                                                                                | SA(5) | A (4) | N (3) | D (2) | SD(1) |
|----------------------------------------------------------------------------------------------------------|-------|-------|-------|-------|-------|
| <b>A: Female partners behavior intentions on birth preparedness</b>                                      |       |       |       |       |       |
| <i>Assessment of attitude</i>                                                                            |       |       |       |       |       |
| 1. If I make arrangement for transport to be used in case emergency, I am doing something good.          |       |       |       |       |       |
| 2. If I mobilize resources to assist during childbirth, I am doing a positive thing.                     |       |       |       |       |       |
| 3. If I identify skilled birth attendant during pregnancy, I am doing a positive thing.                  |       |       |       |       |       |
| 4. If I identify a relative who will donate a blood in case of emergency I am doing something good       |       |       |       |       |       |
| 5. Preparation for birth ensure timely access to skilled birth attendant                                 |       |       |       |       |       |
| <i>Assessment of subjective norms</i>                                                                    |       |       |       |       |       |
| 6. Important people to me think I should prepare transport during pregnancy                              |       |       |       |       |       |
| 7. Important people to me think I should mobilize resources during pregnancy                             |       |       |       |       |       |
| 8. Important people to me think I should identify skilled birth attendants during pregnancy.             |       |       |       |       |       |
| 9. Important people to me think I should identify a relative who will donate blood in case of emergency. |       |       |       |       |       |

|                                                                                                              |  |  |  |  |  |
|--------------------------------------------------------------------------------------------------------------|--|--|--|--|--|
| 10. When it comes to preparation for birth I will do what the health providers advice me to do.              |  |  |  |  |  |
| <b>Perceived Behavioral Control</b>                                                                          |  |  |  |  |  |
| 11. For me to prepare transport during pregnancy is trouble-free and I can do it                             |  |  |  |  |  |
| 12. For me to mobilize resources during pregnancy to be used during childbirth is effortless and I can do it |  |  |  |  |  |
| 13. For me to identify skilled birth attendants during pregnancy is simple and I can do it                   |  |  |  |  |  |
| 14. For me to identify a relative who will donate blood in case of emergency is simple and I can do it.      |  |  |  |  |  |
| 15. Preparation for birth is within my control                                                               |  |  |  |  |  |
| <b>B: Female partners' behavior intentions to utilize available maternal services</b>                        |  |  |  |  |  |
| <b>Attitude</b>                                                                                              |  |  |  |  |  |
| 16. If I attend antenatal clinic four or more times, I am doing a good thing                                 |  |  |  |  |  |
| 17. If I get vaccinated against tetanus toxoid, I am doing a good thing                                      |  |  |  |  |  |
| 18. If I test for HIV during antenatal visits, I am doing a good thing                                       |  |  |  |  |  |
| 19. If I test for Syphilis during pregnancy, I am doing a good thing                                         |  |  |  |  |  |
| 20. If I attend for skilled birth attendant, I am doing a good thing                                         |  |  |  |  |  |
| 21. If I attend for skilled postnatal service seven days after delivery, I am doing a good thing             |  |  |  |  |  |
| 22. When I utilize available maternal services, I will ensure good birth outcome                             |  |  |  |  |  |
| <b>Assessment of subjective norms</b>                                                                        |  |  |  |  |  |

|                                                                                                             |  |  |  |  |  |
|-------------------------------------------------------------------------------------------------------------|--|--|--|--|--|
| 23. Important people to me think I should attend four or more antenatal visits                              |  |  |  |  |  |
| 24. Important people to me think I should get vaccinated against tetanus                                    |  |  |  |  |  |
| 25. Important people to me think I should test for HIV during pregnancy                                     |  |  |  |  |  |
| 26. Important people to me think I should get testes for syphilis during pregnancy                          |  |  |  |  |  |
| 27. Important people to me think I should use skilled birth attendants during childbirth                    |  |  |  |  |  |
| 28. Important people to me think I should attend postnatal care seven days after delivery                   |  |  |  |  |  |
| 29. When it comes to maternal services utilization, I will do what the health care provider advice me to do |  |  |  |  |  |
| <b><i>Perceived Behavioral Control</i></b>                                                                  |  |  |  |  |  |
| 30. For me to attend four or more antenatal clinics is simple and I can do it                               |  |  |  |  |  |
| 31. For me to get vaccinated against tetanus is simple and I can do it                                      |  |  |  |  |  |
| 32. For me to be tested for HIV is trouble free and I can do it                                             |  |  |  |  |  |
| 33. For me to be screened for STI such as syphilis is trouble free and I can do it                          |  |  |  |  |  |
| 34. For me to use skilled services for delivery is simple and I can do it                                   |  |  |  |  |  |
| 35. For me to attend for postnatal checkups after seven days delivery is trouble free and I can do it       |  |  |  |  |  |
| 36. For me to use available maternal health services is simple and I can do so.                             |  |  |  |  |  |
| <b>C: Male involvement</b>                                                                                  |  |  |  |  |  |

| <i><b>Attitude</b></i>                                                                                                                                                        |  |  |  |  |  |
|-------------------------------------------------------------------------------------------------------------------------------------------------------------------------------|--|--|--|--|--|
| 37. If my husband participate in setting aside some funds and equipments which will be used in case of emergency or during delivery is doing a good thing which is beneficial |  |  |  |  |  |
| 38. If my husband participate in preparation of transport which will be used in case of emergency or during childbirth is doing a good which is beneficial                    |  |  |  |  |  |
| 39. If my husband participate in identification of skilled attendant is doing a good thing which is beneficial                                                                |  |  |  |  |  |
| 40. If my husband accompany me during antenatal clinics is doing a good thing which is beneficial                                                                             |  |  |  |  |  |
| 41. If my husband test for HIV with me during pregnancy is doing a good thing which is beneficial                                                                             |  |  |  |  |  |
| 42. If my husband test for syphilis with me during antenatal clinics he is doing a good thing which is beneficial                                                             |  |  |  |  |  |
| 43. If my husband accompany me during childbirth he is doing a good thing which is beneficial                                                                                 |  |  |  |  |  |
| 44. If my husband accompany me for postnatal checkups he is doing a good thing which is beneficial                                                                            |  |  |  |  |  |
| <i><b>Assessment of subjective norms</b></i>                                                                                                                                  |  |  |  |  |  |
| 45. Important people to me think my husband has to participate in setting aside funds and equipments to be used in case of emergency or during childbirth.                    |  |  |  |  |  |
| 46. Important people to me think my husband has participate in preparation of transport to be used in case of emergency or during childbirth                                  |  |  |  |  |  |
| 47. Important people to me think my husband should participate in identification of skilled birth attendant                                                                   |  |  |  |  |  |

|                                                                                                                                                               |  |  |  |  |  |
|---------------------------------------------------------------------------------------------------------------------------------------------------------------|--|--|--|--|--|
| 48. Important people to me think my husband has to accompany me during antenatal clinics                                                                      |  |  |  |  |  |
| 49. Important people to me think my husband has to test for HIV with me during antenatal visits                                                               |  |  |  |  |  |
| 50. Important people to me think my husband has to screen for syphilis with me during antenatal visit                                                         |  |  |  |  |  |
| 51. Important people to me think my husband has to accompany me during childbirth                                                                             |  |  |  |  |  |
| 52. Important people to me think my husband has to accompany me during postnatal checkups                                                                     |  |  |  |  |  |
| <b><i>Perceived Behavioral Control</i></b>                                                                                                                    |  |  |  |  |  |
| 53. For my husband to participate in setting aside funds and equipments to be used in case of emergency or during childbirth is trouble free and he can do it |  |  |  |  |  |
| 54. For my husband to participate in preparation of transport to be used in case of emergency or during childbirth is simple and he can do it                 |  |  |  |  |  |
| 55. For my husband to participate in identification of skilled birth attendant is trouble free and he can do it                                               |  |  |  |  |  |
| 56. For my husband to accompany me during antenatal clinics is simple and he can do it                                                                        |  |  |  |  |  |
| 57. For my husband to test for HIV/AIDS with me during antenatal visits is trouble free and he can do it                                                      |  |  |  |  |  |
| 58. For my husband to test for syphilis with me during antenatal clinics is simple and he can do it                                                           |  |  |  |  |  |
| 59. For my husband to accompany me during labor and childbirth is simple and he can do it.                                                                    |  |  |  |  |  |
| 60. For my husband to accompany me during postnatal checkup is trouble free and he can do it                                                                  |  |  |  |  |  |

## Second questionnaire: Male Partners

### Part A: Baseline Information

Please tick (✓) the appropriate option

1. Age in years \_\_\_\_\_
2. Age at marriage in years \_\_\_\_\_
3. Phone number \_\_\_\_\_
4. Marital status
  - a) Married ( )
  - b) Cohabited ( )
5. Educational status
  - a) None ( )
  - b) Primary level incomplete ( )
  - c) Primary level complete ( )
  - d) Secondary or higher ( )
6. Employment status
  - a) Employed ( )
  - b) Unemployed ( )
7. Religion
  - a) Christian ( )
  - b) Muslims ( )
  - c) Others specify.....
8. Ethnic group
  - a) Fipa ( )
  - b) Mambwe ( )
  - c) Others specify.....
9. Economic status
  - a) Use less than one dollar per day ( )
  - b) Use more than one dollar per day ( )
10. Do you own radio?
  - a) Yes ( )
  - b) No ( )
11. Do you own mobile phone?
  - a) Yes ( )
  - b) No ( )
12. Characteristic of a nearby health facility
  - a) Dispensary ( )
  - b) Health center ( )
  - c) Hospital ( )
13. What is the walking distance to a nearby health facility?
  - a) Less than one kilometer ( )
  - b) One kilometer-5kilometers ( )
  - c) More than five kilometers ( )
14. Are you covered with health Insurance (NHIF or CHF)?
  - a) Yes ( )
  - b) No ( )

15. Have you ever heard the term “birth preparedness”?

- a) Yes ( )                      b) No ( )

16. Where did you hear about birth preparedness?

- a) From health worker ( )  
b) From the media ( )  
c) From a family member ( )  
d) Others specify\_\_\_\_\_

### **Part B: Knowledge on Birth Preparedness**

Now I would like to ask you some questions about pregnancy and childbirth. Specifically, I am going to be asking you questions about three different phases that women go through when having a child. These phases are the period of being pregnant, the period of labor and birth, and the period immediately after the birth of the child (JHPIEGO, 2004).

17. In your opinion, can unforeseen problems related to pregnancy occur during any pregnancy or childbirth that could endanger the life of a woman?

- a) Yes ( )                      b) No ( )

18. What are some serious health problems that can occur during pregnancy that could endanger the life of a pregnant woman?

- a) \_\_\_\_\_ d) \_\_\_\_\_  
b) \_\_\_\_\_ e) \_\_\_\_\_  
c) \_\_\_\_\_ f) \_\_\_\_\_

19. In your opinion, could a woman die from [this problem] any of these problems?

- b) Yes ( )                      b) No ( )

20. What are some serious health problems that can occur during labor and childbirth that could endanger the life of a pregnant woman?

a) \_\_\_\_\_

d) \_\_\_\_\_

b) \_\_\_\_\_

e) \_\_\_\_\_

c) \_\_\_\_\_

f) \_\_\_\_\_

21. In your opinion, could a woman die from [this problem] any of these problems?

- a) Yes ( )                      b) No ( )

22. What are some serious health problems that can occur during the first 42 days after birth that could endanger the life of the woman?

- a) \_\_\_\_\_ d) \_\_\_\_\_  
b) \_\_\_\_\_ e) \_\_\_\_\_  
c) \_\_\_\_\_ f) \_\_\_\_\_

23. In your opinion, could a woman die from [this problem] any of these problems?

- a) Yes ( )                      b) No ( )

24. Now, I would like to ask you a few questions about the health of newborn babies. What are some serious health problems that can occur during the first 7 days after birth that could endanger the life of a newborn baby?

- a) \_\_\_\_\_ d) \_\_\_\_\_  
b) \_\_\_\_\_ e) \_\_\_\_\_  
c) \_\_\_\_\_ f) \_\_\_\_\_

25. In your opinion, could a newborn baby die from [this problem] any of these problems?

- a) Yes ( )                      b) No ( )

26. What are some the six key elements of birth preparedness?

- a) \_\_\_\_\_ d) \_\_\_\_\_  
b) \_\_\_\_\_ e) \_\_\_\_\_  
c) \_\_\_\_\_ f) \_\_\_\_\_

27. When a pregnant woman has to start antenatal clinic?

- a) Below 16 weeks gestation age ( )

- b) 17-24 weeks ( )
- c) Above 24 weeks ( )

28. What are the recommended antenatal visits

- a) Four or more ( )
- b) Three ( )
- c) Two ( )
- d) One ( )
- e)

**Part C: Male partners behavior intentions to birth preparedness and maternal services utilization**

Many questions in this survey make use of rating scales with 5 places; you are to tick (✓) the box that best describes your opinion where SA= strongly agree, A= agree, N= Neutral, D= disagree and SD = strongly disagree

| Component                                                                                          | SA(5) | A (4) | N (3) | D (2) | SD(1) |
|----------------------------------------------------------------------------------------------------|-------|-------|-------|-------|-------|
| <b>A: Male partners behavior intentions on birth preparedness</b>                                  |       |       |       |       |       |
| <i>Assessment of attitude</i>                                                                      |       |       |       |       |       |
| 1. If I make arrangement for transport to be used in case emergency, I am doing something good.    |       |       |       |       |       |
| 2. If I mobilize resources to assist during childbirth, I am doing a positive thing.               |       |       |       |       |       |
| 3. If I identify skilled birth attendant during pregnancy, I am doing a positive thing.            |       |       |       |       |       |
| 4. If I identify a relative who will donate a blood in case of emergency I am doing something good |       |       |       |       |       |
| 5. Preparation for birth ensure timely access to skilled birth attendant                           |       |       |       |       |       |
| <i>Assessment of subjective norms</i>                                                              |       |       |       |       |       |

|                                                                                                              |  |  |  |  |  |
|--------------------------------------------------------------------------------------------------------------|--|--|--|--|--|
| 6. Important people to me think I should prepare transport during pregnancy                                  |  |  |  |  |  |
| 7. Important people to me think I should mobilize resources during pregnancy                                 |  |  |  |  |  |
| 8. Important people to me think I should identify skilled birth attendants during pregnancy.                 |  |  |  |  |  |
| 9. Important people to me think I should identify a relative who will donate blood in case of emergency.     |  |  |  |  |  |
| 10. When it comes to preparation for birth I will do what the health providers advice me to do.              |  |  |  |  |  |
| <b><i>Perceived Behavioral Control</i></b>                                                                   |  |  |  |  |  |
| 11. For me to prepare transport during pregnancy is trouble-free and I can do it                             |  |  |  |  |  |
| 12. For me to mobilize resources during pregnancy to be used during childbirth is effortless and I can do it |  |  |  |  |  |
| 13. For me to identify skilled birth attendants during pregnancy is simple and I can do it                   |  |  |  |  |  |
| 14. For me to identify a relative who will donate blood in case of emergency is simple and I can do it.      |  |  |  |  |  |
| 15. Preparation for birth is within my control                                                               |  |  |  |  |  |
| <b>B: Female partners' behavior intentions to utilize available maternal services</b>                        |  |  |  |  |  |
| <b><i>Attitude towards birth preparedness</i></b>                                                            |  |  |  |  |  |
| 16. If my wife attend antenatal clinic four or more times, she is doing a good thing                         |  |  |  |  |  |
| 17. If she gets vaccinated against tetanus toxoid, she is doing a good thing                                 |  |  |  |  |  |

|                                                                                                               |  |  |  |  |  |
|---------------------------------------------------------------------------------------------------------------|--|--|--|--|--|
| 18. If she tests for HIV during antenatal visits, she is doing a good thing                                   |  |  |  |  |  |
| 19. If she tests for Syphilis during pregnancy, she is doing a good thing                                     |  |  |  |  |  |
| 20. If she attends for skilled birth attendant, she is doing a good thing                                     |  |  |  |  |  |
| 21. If she attends for skilled postnatal service seven days after delivery, she is doing a good thing         |  |  |  |  |  |
| 22. If she utilizes available maternal services, she will ensure good birth outcome                           |  |  |  |  |  |
| <b><i>Assessment of subjective norms</i></b>                                                                  |  |  |  |  |  |
| 23. Important people to me think my wife should attend four or more antenatal visits                          |  |  |  |  |  |
| 24. Important people to me think she should get vaccinated against tetanus                                    |  |  |  |  |  |
| 25. Important people to me think she should test for HIV during pregnancy                                     |  |  |  |  |  |
| 26. Important people to me think she should get testes for syphilis during pregnancy                          |  |  |  |  |  |
| 27. Important people to me think she should use skilled birth attendants during childbirth                    |  |  |  |  |  |
| 28. Important people to me think she should attend postnatal care seven days after delivery                   |  |  |  |  |  |
| 29. When it comes to maternal services utilization, she will do what the health care provider advice me to do |  |  |  |  |  |
| <b><i>Perceived Behavioral Control</i></b>                                                                    |  |  |  |  |  |
| 30. For my wife to attend four or more antenatal clinics is simple and she can do it                          |  |  |  |  |  |
| 31. For my wife to get vaccinated against tetanus is simple and she can do it                                 |  |  |  |  |  |

|                                                                                                                                                    |  |  |  |  |  |
|----------------------------------------------------------------------------------------------------------------------------------------------------|--|--|--|--|--|
| 32. For my wife to be tested for HIV is trouble free and she can do it                                                                             |  |  |  |  |  |
| 33. For my wife to be screened for STI such as syphilis is trouble free and she can do it                                                          |  |  |  |  |  |
| 34. For my wife to use skilled services for delivery is simple and I can do it                                                                     |  |  |  |  |  |
| 35. For my wife to attend for postnatal checkups after seven days of delivery is trouble free and she can do it                                    |  |  |  |  |  |
| 36. For my wife to use available maternal health services is simple and she can do so.                                                             |  |  |  |  |  |
| <b>C: Male involvement</b>                                                                                                                         |  |  |  |  |  |
| <i>Attitude towards male involvement</i>                                                                                                           |  |  |  |  |  |
| 37. If I participate in setting aside some funds and equipments which will be used in case of emergency or during delivery I am doing a good thing |  |  |  |  |  |
| 38. If I participate in preparation of transport which will be used in case of emergency or during childbirth I am doing a good thing              |  |  |  |  |  |
| 39. If I participate in identification of skilled attendant I am doing a good thing                                                                |  |  |  |  |  |
| 40. If I accompany my wife during antenatal clinics I am doing a good thing                                                                        |  |  |  |  |  |
| 41. If I test for HIV with my wife during pregnancy I am doing a good thing                                                                        |  |  |  |  |  |
| 42. If I test for syphilis with my wife during antenatal clinics I am doing a good thing                                                           |  |  |  |  |  |
| 43. If I accompany my wife during childbirth I am doing a good thing                                                                               |  |  |  |  |  |

|                                                                                                                                                      |  |  |  |  |  |
|------------------------------------------------------------------------------------------------------------------------------------------------------|--|--|--|--|--|
| 44. If I accompany my wife for postnatal checkups I am doing a good thing which is beneficial                                                        |  |  |  |  |  |
| <b><i>Assessment of subjective norms</i></b>                                                                                                         |  |  |  |  |  |
| 45. Important people to me think I have to participate in setting aside funds and equipments to be used in case of emergency or during childbirth.   |  |  |  |  |  |
| 46. Important people to me think I have to participate in preparation of transport to be used in case of emergency or during childbirth              |  |  |  |  |  |
| 47. Important people to me think I should participate in identification of skilled birth attendant                                                   |  |  |  |  |  |
| 48. Important people to me think I have to accompany my wife during antenatal clinics                                                                |  |  |  |  |  |
| 49. Important people to me think I have to test for HIV with my wife during antenatal visits                                                         |  |  |  |  |  |
| 50. Important people to me think I have to screen for syphilis with my wife during antenatal visit                                                   |  |  |  |  |  |
| 51. Important people to me think I have to accompany my wife during childbirth                                                                       |  |  |  |  |  |
| 52. Important people to me think I have to accompany my wife during postnatal checkups                                                               |  |  |  |  |  |
| <b><i>Perceived Behavioral Control</i></b>                                                                                                           |  |  |  |  |  |
| 53. For me to participate in setting aside funds and equipments to be used in case of emergency or during childbirth is trouble free and I can do it |  |  |  |  |  |
| 54. For me to participate in preparation of transport to be used in case of emergency or during childbirth is simple and I can do it                 |  |  |  |  |  |

|                                                                                                        |  |  |  |  |  |
|--------------------------------------------------------------------------------------------------------|--|--|--|--|--|
| 55. For me to participate in identification of skilled birth attendant is trouble free and I can do it |  |  |  |  |  |
| 56. For me to accompany my wife during antenatal clinics is simple and I can do it                     |  |  |  |  |  |
| 57. For me to test for HIV/AIDS with my wife during antenatal visits is trouble free and I can do it   |  |  |  |  |  |
| 58. For me to test for syphilis with my wife during antenatal clinics is simple and I can do it        |  |  |  |  |  |
| 59. For me to accompany my wife during labor and childbirth is simple and I can do it.                 |  |  |  |  |  |
| 60. For me to accompany my wife during postnatal checkup is trouble free and I can do it               |  |  |  |  |  |
